# Supplementary material
Source: Springer Nature journal article supplement (https://www.springermedizin.de/resource/supplementary/12865_2013_580_MOESM6_ESM.pdf/9428280)

**A****Serum Anti-DNA Autoantibody Levels**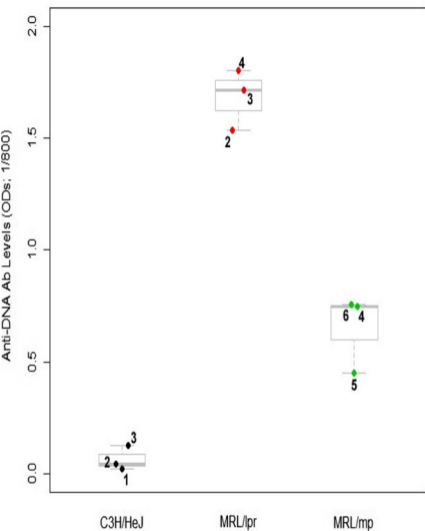**B****Spleen Weight**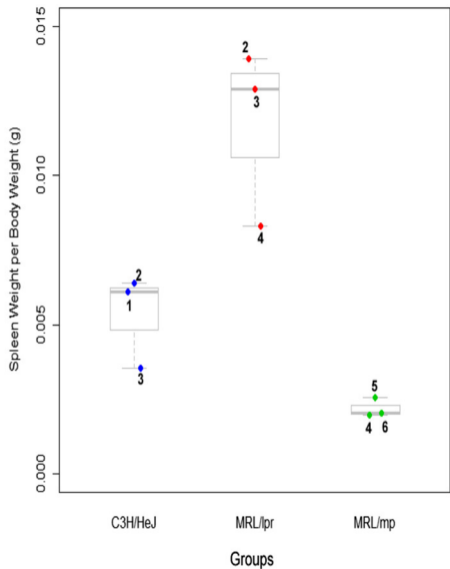

Supplement: MOESM6 [file 9428280]
